# Supplementary material for: Tocilizumab in COVID-19: Factors Associated With Mortality Before and After Treatment
Source: PubMed Central journal article supplement (PMC8281134; doi:10.3389/fphar.2021.620187), 2021-07-01
Supplement: Table1.pdf [file Table1.pdf]

## Supplementary Material

**Supplementary Table 1.** Description of analytical parameters measured at day 3, 6 and 9 of patients diagnosed of COVID-19 and receiving tocilizumab (TCZ).

| Laboratory/clinical findings<br>3 days post-TCZ, median (IQR) [N]<br>except when indicated          | Total                        | Deceased                    | Survivors                   |
|-----------------------------------------------------------------------------------------------------|------------------------------|-----------------------------|-----------------------------|
| Total serum proteins (gr/dL), mean (SD)                                                             | 6 (0.7) [81]                 | 5.7 (0.7) [19]              | 6 (0.7) [62]                |
| Albumin (gr/dL)                                                                                     | 3.2 (2.9-3.6) [72]           | 3 (2.7-3.2) [18]            | 3.3 (3-3.6) [54]            |
| AST (U/L)                                                                                           | 36 (24-47) [99]              | 43.5 (33-68) [24]           | 33 (23-46) [75]             |
| ALT (U/L)                                                                                           | 53 (30-95) [101]             | 49.5 (35.5-73) [24]         | 54 (29-96) [77]             |
| GGT (U/L)                                                                                           | 117 (69-209) [73]            | 104 (72-181) [17]           | 117.5 (65-209.5) [56]       |
| LDH (U/L)                                                                                           | 435 (367-544) [99]           | 570.5 (464-643.5) [24]      | 411 (361-473) [75]          |
| Troponin I (pg/mL)                                                                                  | 4.9 (2-13.6) [59]            | 14.6 (5.2-81.9) [14]        | 3.8 (1.9-9.7) [45]          |
| CRP (mg/L)                                                                                          | 19.8 (7.6-41.5) [102]        | 20.9 (8.7-55.9) [25]        | 19.6 (7-40.3) [77]          |
| Procalcitonine (ng/mL)                                                                              | 0.1 (0.0-0.2) [72]           | 0.1 (0.1-0.2) [18]          | 0.1 (0.0-0.2) [54]          |
| Ferritin (ng/mL)                                                                                    | 1326.8 (732-2180) [98]       | 1115.8 (1219.1-3878.2) [23] | 1152.8 (555-2131.2) [75]    |
| Leukocyte count (/μL)                                                                               | 9260 (6520-11990) [101]      | 10030 (6980-16320) [25]     | 9195 (6510-11865) [76]      |
| Neutrophil count (/μL)                                                                              | 7530 (5400-10275) [100]      | 8605 (5795-15240) [24]      | 7435 (5230-9590) [76]       |
| Lymphocyte count (/μL)                                                                              | 693.5 (479.5-1045) [100]     | 605 (370-870) [24]          | 725 (500-1215) [76]         |
| Platelet count (/μL)                                                                                | 293500 (230500-381500) [100] | 244000 (189500-282500) [24] | 36500 (248500-411000) [76]  |
| IL-6 (pg/mL)                                                                                        | 119.2 (42.3-700.6) [31]      | 1293.2 (892.1-1500) [6]     | 77.7 (29.2-276) [25]        |
| DD (mg/L)                                                                                           | 1.7 (0.7-4.4) [100]          | 2.3 (1.3-5.1) [25]          | 1.4 (0.6-4.0) [75]          |
| Fibrinogen (mg/dL), mean (SD)                                                                       | 451.3 (185.3) [72]           | 454.2 (189.6) [20]          | 450.2 (185.5) [52]          |
| PaO <sub>2</sub> /FiO <sub>2</sub> (mmHg)                                                           | 200 (172-286) [107]          | 191 (160-220) [28]          | 207 (176-289) [79]          |
| Temperature (°C), mean (SD)                                                                         | 36.1 (0.9) [42]              | 36.5 (1.7) [9]              | 36 (0.5) [33]               |
| <b>Laboratory/clinical findings<br/>6 days post-TCZ, median (IQR) [N] except<br/>when indicated</b> |                              |                             |                             |
| Total serum proteins (gr/dL), mean (SD)                                                             | 5.9 (0.6) [79]               | 5.9 (0.7) [19]              | 6.0 (0.6) [60]              |
| Albumin (gr/dL)                                                                                     | 3.2 (3.0-3.5) [68]           | 3.1 (2.9-3.3) [19]          | 3.3 (3.0-3.6) [49]          |
| AST (U/L)                                                                                           | 32.5 (23.0-50.0) [88]        | 32.5 (23.0-57.0) [20]       | 32.5 (23.0-48.5) [68]       |
| ALT (U/L)                                                                                           | 62.0 (37.0-118.0) [90]       | 46.0 (26.0-100.0) [21]      | 64 (42-118) [69]            |
| GGT (U/L)                                                                                           | 121 (68-291) [67]            | 101.5 (58-302) [18]         | 121 (73-277) [49]           |
| LDH (U/L)                                                                                           | 401 (322-496) [90]           | 572 (425-603) [21]          | 383 (317-439) [69]          |
| Troponin I (pg/mL)                                                                                  | 4.7 (2.3-18.3) [55]          | 19.1 (8.6-134.5) [15]       | 4 (1.9-6.8) [40]            |
| CRP (mg/L)                                                                                          | 4.9 (2.2-9.2) [89]           | 7.5 (3.7-13.5) [20]         | 4.3 (2.0-8.8) [69]          |
| Procalcitonine (ng/mL)                                                                              | 0.1 (0.0-0.1) [61]           | 0.1 (0.1-0.3) [17]          | 0.0 (0.0-0.1) [44]          |
| Ferritin (ng/mL)                                                                                    | 1288.4 (840-2134.1) [85]     | 1494 (1090-3469.3) [19]     | 1278 (728.5-1905) [66]      |
| Leukocyte count (/μL)                                                                               | 11490 (8780-14490) [91]      | 14545 (9120-23570) [22]     | 11340 (8690-13620) [69]     |
| Neutrophil count (/μL)                                                                              | 8915 (7070-13122) [90]       | 12020 (7710-15830) [21]     | 8340 (6960-12520) [69]      |
| Lymphocyte count (/μL)                                                                              | 950 (610-1670) [90]          | 730 (600-920) [21]          | 1040 (620-1820) [69]        |
| Platelet count (/μL)                                                                                | 302000 (231000-378000) [90]  | 213000 (189000-296000) [21] | 322000 (247000-432000) [69] |
| IL-6 (pg/mL)                                                                                        | 137.9 (31-566) [22]          | 645.4 (520-3206) [6]        | 66 (6.3-273.2) [16]         |
| DD (mg/L)                                                                                           | 2.2 (0.8-5.5) [87]           | 5.3 (1.4-18.9) [21]         | 2 (0.7-4.7) [76]            |
| Fibrinogen (mg/dL), mean (SD)                                                                       | 323.2 (148.4) [63]           | 314.4 (156.8) [17]          | 326.4 (146.8) [46]          |
| PaO <sub>2</sub> /FiO <sub>2</sub> (mmHg)                                                           | 226 (180-325) [96]           | 185 (180-230) [21]          | 250 (182-355) [75]          |
| Temperature (°C), mean (SD)                                                                         | 36.2 (0.7) [40]              | 36.5 (1.5) [5]              | 36.1 (0.6) [35]             |

SD: Standard deviation; IQR: interquartile range; AST: Aspartate aminotransferase; ALT: Alanine aminotransferase; GGT:  $\gamma$ -glutamyl transferase; LDH: Lactate DesHydrogenase; CRP: C- Reactive Protein; IL-6: Interleukin 6; DD: D- Dimer.

## Supplementary Material

**Supplementary Table 1 (cont.).** Description of analytical parameters measured at day 3, 6 and 9 of patients diagnosed of COVID-19 and receiving tocilizumab (TCZ).

| Laboratory/clinical findings<br>9 days post-TCZ median (IQR) [N]<br>except when indicated | Total                       | Deceased                    | Survivors                   |
|-------------------------------------------------------------------------------------------|-----------------------------|-----------------------------|-----------------------------|
| Total serum proteins (gr/dL), mean (SD)                                                   | 5.9 (0.7) [67]              | 5.6 (0.9) [17]              | 6.0 (0.5) [50]              |
| Albumin (gr/dL)                                                                           | 3.3 (3-3.5) [59]            | 3.1 (2.9-3.3) [17]          | 3.3 (3-3.5) [42]            |
| AST (U/L)                                                                                 | 30 (22-48) [74]             | 37 (31-67) [17]             | 27 (21-45) [57]             |
| ALT (U/L)                                                                                 | 65 (44-121) [75]            | 72 (42-157) [17]            | 64 (45-115) [58]            |
| GGT (U/L)                                                                                 | 152 (67-303) [57]           | 156 (73-344) [17]           | 138.5 (66-298.5) [40]       |
| LDH (U/L)                                                                                 | 374 (302.5-487.5) [76]      | 619 (441-794) [17]          | 361 (279-452) [59]          |
| Troponin I (pg/mL)                                                                        | 10 (3.8-68.7) [42]          | 74.4 (10.6-389.4) [13]      | 6.4 (2.9-11.2) [29]         |
| CRP (mg/L)                                                                                | 2.2 (1.2-6.1) [74]          | 7.8 (2.8-23.6) [16]         | 1.9 (1.1-4.0) [58]          |
| Procalcitonine (ng/mL)                                                                    | 0.1 (0.0-0.1) [50]          | 0.2 (0.1-1.5) [16]          | 0.0 (0.0-0.1) [34]          |
| Ferritin (ng/mL)                                                                          | 1339.9 (578.1-2088.2) [74]  | 1567 (1058.7-4043.5) [17]   | 1165 (490.2-1837.3) [57]    |
| Leukocyte count (/μL)                                                                     | 11830 (8255-16825) [76]     | 18570 (14540-26530) [17]    | 9920 (7720-14040) [59]      |
| Neutrophil count (/μL)                                                                    | 8485 (5830-14665) [76]      | 15880 (12900-22240) [17]    | 7730 (5080-11050) [59]      |
| Lymphocyte count (/μL)                                                                    | 1240 (680-1810) [75]        | 770 (565-995) [16]          | 1340 (860-1960) [59]        |
| Platelet count (/μL)                                                                      | 264500 (179000-321500) [76] | 207000 (155000-274000) [17] | 281000 (206000-338000) [59] |
| IL-6 (pg/mL)                                                                              | 33 (9.8-40.7) [5]           | N/A [0]                     | 33 (9.8-40.7) [5]           |
| DD (mg/L)                                                                                 | 1.7 (0.9-3.9) [75]          | 3.2 (1.2-7.3) [17]          | 1.5 (0.8-3.4) [58]          |
| Fibrinogen (mg/dL), mean (SD)                                                             | 318.9 (165.5) [53]          | 336.5 (131.3) [16]          | 311.4 (179.3) [37]          |
| PaO <sub>2</sub> /FiO <sub>2</sub> (mmHg)                                                 | 245.5 (171-354.5) [76]      | 174 (160-222) [18]          | 285.5 (190-380) [31]        |
| Temperature (°C), mean (SD)                                                               | 36.2 (0.8) [23]             | 38 (0) [2]                  | 36.0 (0.6) [21]             |

SD: Standard deviation; IQR: interquartile range; AST: Aspartate aminotransferase; ALT: Alanine aminotransferase; GGT:  $\gamma$ -glutamyl transferase; LDH: Lactate Dehydrogenase; CRP: C- Reactive Protein; IL-6: Interleukin 6; DD: D- Dimer.
